1 **TITLE**

2 Resource requirements for ecotoxicity testing: A comparison of traditional and new approach  
3 methods

4  
5 **Authors and Affiliations**

6 Krittika Mittal<sup>†\*</sup>, Doug Crump<sup>‡</sup>, Jessica A. Head<sup>†</sup>, Markus Hecker<sup>§</sup>, Gordon Hickey<sup>†</sup>, Steve  
7 Maguire<sup>⊥</sup>, Natacha Hogan<sup>∇</sup>, Jianguo Xia<sup>†</sup>, Niladri Basu<sup>†</sup>

8  
9 <sup>†</sup>*Faculty of Agricultural and Environmental Sciences, McGill University, Montreal, QC, Canada*

10 <sup>‡</sup>*National Wildlife Research Centre, Environment and Climate Change Canada, Ottawa, ON,*  
11 *Canada*

12 <sup>§</sup>*School of Environment and Sustainability, Toxicology Center, University of Saskatchewan,*  
13 *Saskatoon, SK, Canada*

14 <sup>⊥</sup>*University of Sydney Business School, Sydney, Australia*

15 <sup>∇</sup>*Department of Animal and Poultry Science, Toxicology Center, University of Saskatchewan,*  
16 *Saskatoon, SK, Canada*

17

18

19 \*Corresponding Author: Krittika Mittal ([krittika.mittal@mcgill.ca](mailto:krittika.mittal@mcgill.ca))

20

21 **TITLE**

22 Resource requirements for ecotoxicity testing: A comparison of traditional and new approach  
23 methods

24 **ABSTRACT**

25 Toxicity testing is under transformation as it aims to harness the potential of New Approach  
26 Methods (NAMs) as alternative test methods that may be less resource intensive (i.e., fewer  
27 animals, cheaper costs, quicker assays) than traditional approaches while also providing more  
28 data and information. While many stakeholders are of the opinion that this unfolding  
29 transformation holds significant promise as a more efficient and ethical way forward, few studies  
30 have compared the resources required for NAMs versus those needed for traditional animal-  
31 based toxicity tests, particularly in the field of ecotoxicology. The objective was to compare  
32 resources needed for traditional animal-based ecotoxicity tests versus alternative tests using  
33 emergent NAMs. From a bibliometric review, we estimate that traditional tests for a single  
34 chemical cost \$118,000 USD, require 135 animals, and take 8 weeks. In comparison, alternative  
35 tests cost \$2,600, require 20 animals (or none), and take up to 4 weeks to test 16 (to potentially  
36 hundreds of) chemicals. Based on our analysis we conclude that NAMs in ecotoxicology can be  
37 more advantageous than traditional methods in terms of resources required (i.e., monetary costs,  
38 number of animals needed, and testing times). We note, however, that the evidence underpinning  
39 these conclusions is relatively sparse. Moving forward, groups developing and applying NAMs  
40 should provide more detailed accounts of the resources required. In addition, there is also a need  
41 for carefully designed case studies that demonstrate the domain of applicability of NAMs (and  
42 make comparisons to traditional tests) to ultimately build confidence among the user community.

43 *Keywords:* animals, ecotoxicology, toxicity tests, alternative testing strategies, 3Rs

44

## 45 INTRODUCTION

46

47 Scientific research is increasingly emphasizing the global threat posed by potential chemical  
48 contamination (Rockström et al. 2009; Landrigan et al. 2017). The traditional approach to  
49 toxicity testing of environmental chemicals and complex mixtures, which uses live animals and  
50 characterizes apical measures (e.g., survival, growth, development), has been the mainstay of  
51 toxicity testing since the 1920s. However, this approach is now shifting towards a diverse range  
52 of new approach methods (NAMs; Supplemental Figure SF1). The term NAM first originated at  
53 a European Chemicals Agency (ECHA) workshop in 2016. NAM is defined by the U.S.  
54 Environment Protection Agency (US EPA) as *any technology, methodology, approach, or*  
55 *combination thereof that can be used to provide information on chemical hazard and risk*  
56 *assessment that avoids the use of intact animals*, and thus NAMs are recognized as  
57 encompassing *any alternative test methods or strategies to reduce, refine, or replace vertebrate*  
58 *animals including in silico modeling, in vitro bioassays, early-life stage testing and*  
59 *toxicogenomics* (European Chemicals Agency 2016; US EPA 2019). The contemporary basis for  
60 this shift was spurred by the U.S. National Research Council (NRC) report “Toxicity Testing in  
61 the 21<sup>st</sup> Century – a Vision and Strategy” (NRC 2007) which advocated modernization of  
62 toxicity testing into a more predictive, mechanistic and resource-efficient approach, and  
63 ultimately one that could better satisfy regulatory and societal needs.

64

65 Many stakeholders within academia, government, non-governmental organizations, and industry  
66 are of the opinion that the unfolding transformation in toxicity testing holds significant promise  
67 as a more efficient and ethical way forward. However, few studies have compared the resources  
68 required for NAMs versus those needed for traditional animal-based toxicity tests. Of the

69 comparisons made, most are from the human health perspective (e.g., mammalian toxicology),  
70 and relatively little is known about vertebrate tests that underpin ecotoxicity assessments (Rovida  
71 and Hartung 2009; Settivari et al. 2015; Stanton and Kruszewski 2016; Meigs et al. 2018). The  
72 objective of this study was to compare three key resource parameters (monetary costs, number of  
73 animals needed, and time required to perform the tests) between traditional ecotoxicity testing  
74 methods that use vertebrate models against possible replacement NAMs. Analyses such as these  
75 are difficult to perform accurately due to complex testing requirements, varied national  
76 regulations, difference in type of information obtained from the two types of methods and  
77 various toxicological endpoints to be considered (Burden et al. 2016; Lillicrap et al. 2016).  
78 Therefore, two strategies were adopted here to help overcome this difficulty. First, the objective  
79 was addressed through a mixed-methods literature review. Second, in addition to a general  
80 comparison of the three resource parameters across various ecotoxicity tests, we present a  
81 specific case, the fish acute toxicity test, for which a fish embryo test and a cell line assay have  
82 been standardized as NAMs. An evaluation of the resources required for traditional methods  
83 versus NAMs is timely and necessary to help document the extent to which emerging NAMs in  
84 ecotoxicology might indeed be more efficient, as there remain professional and organizational  
85 barriers towards the transition (Mondou et al. 2020; Pain et al. 2020).

86

87 **METHODS**

88

89 We compiled data following bibliometric literature searches of specific search terms  
90 (Supplemental Table ST1). From the papers retrieved, a snowball sampling approach was taken  
91 to identify additional information sources. Only papers that provided specific numbers pertaining  
92 to the aforementioned three resource parameters were included. The bibliometric searches were  
93 conducted in October 2018 and resulted in over 1,000 publications. We focused on reports that  
94 examined standardized tests, outlined large-scale projects, and/or presented numbers for  
95 regulatory purposes. For monetary costs of most traditional tests, we relied on information from  
96 an OECD guidance document on chemical testing from 2017 and a number of publications (rows  
97 3 to 6, Supplementary Table ST2). For the number of animals and testing times we  
98 predominantly used OECD and US EPA guidelines for various tests (rows 13 to 27,  
99 Supplementary Table ST2). As our bibliometric search yielded a relatively small database to  
100 work from, we were not able to find numbers for some tests. In these cases, we also consulted  
101 with experts in the field, obtained cost estimates via personal communication from contract  
102 testing organizations, and drew from our own experiences in conducting ecotoxicity tests.  
103 Ultimately, we gathered data from 14 OECD and 2 US EPA guidelines, 16 publications, reviews,  
104 and annual reports on animal testing, approximate costs from companies and our own  
105 experiences (Supplementary Table ST2).

106

107 Fish, birds and amphibians are the most common vertebrates used in ecotoxicology for effluent  
108 testing and testing of individual chemicals, though fish are used in the highest numbers and  
109 global estimates of fish used for effluent testing exceed 5 million per annum (Burden et al. 2016;

110 Norberg-King et al. 2018). Further, a study examining various toxicological endpoints required  
111 for regulatory testing identified four endpoints with high fish usage where substantial savings  
112 could be realized from the incorporation of NAMs, namely, assessment of 1) acute toxicity, 2)  
113 chronic toxicity, 3) bioaccumulation, and 4) endocrine disruptors (Burden et al. 2016).  
114 Therefore, we examined resource needs for common ecotoxicity tests, across the three species,  
115 but focus on the fish acute toxicity test for the specific case study.

116

117

## 118 **RESOURCE COMPARISONS BETWEEN TRADITIONAL AND NEW APPROACH**

### 119 **METHODS**

120 Here, we first provide a general comparison of resources required for traditional tests and NAMs  
121 for fish, birds, and amphibians. Following this, we provide a comparison of the resources  
122 required for the specific traditional test for fish acute toxicity and the corresponding fit-for-  
123 purpose NAMs that have been proposed or accepted as alternatives.

124

#### 125 *General comparison*

126 We identified a total of 12 traditional tests (fish = 7; avian = 3; frogs = 2) and 7 tests using  
127 NAMs (fish = 3; avian = 3; species agnostic in vitro tests = 1). For each of these tests we  
128 examined the requirements with respect to: A) monetary costs, B) number of animals used, and  
129 C) testing times. For specific details on estimates, assumptions, and references see  
130 Supplementary Table ST3.

131

#### 132 *Monetary Costs*

133 The monetary costs per chemical (in USD) of common ecotoxicity tests following standard  
134 guideline tests using vertebrate models range from \$15,598 for the fish acute toxicity test to  
135 \$580,000 for a multi-generational test (Bottini and Hartung 2009; Willett et al. 2011; OECD  
136 2017). Tests using alternative assays range from just under \$1,000 for a primary avian  
137 hepatocyte test to \$136,410 for an early-life stage fish test (Figure 1A). The median value of  
138 traditional tests (\$118,000) is about 45-fold higher than the median value of alternative tests  
139 (\$2,600).

140  
141 The monetary costs of tests can differ across species but also within a particular species group  
142 depending on the nature of the test. Within traditional tests, we see that overall the median cost  
143 for fish varies widely from \$15,598 to \$411,800 per test (26-fold) whereas the cost for birds  
144 ranges from \$116,000 to \$319,000 per test (2.8-fold) and in amphibians ranges from \$87,000 to  
145 \$250,560 per test (2.9-fold). Similarly, in terms of NAMs, the cost of testing across the three fish  
146 tests ranges from \$1,200 to \$136,410 (113-fold), whereas the tests in birds (\$700 to \$1,500) and  
147 species-agnostic cell-free assays (\$1,200 to \$4,000) do not vary largely. The wide range in costs  
148 of the fish NAMs is largely due to the tests involving embryo exposures which require a more  
149 elaborate setup. As a point of comparison, the cost for OECD approved in vitro alternatives for  
150 eye irritation and skin sensitization tests, such as TG 430, 431, 437 and 439, range from \$1,400  
151 to \$4,060 (Humane Society International; Costin 2014)

152  
153 Rovida and Hartung (Rovida and Hartung 2009) estimated the monetary costs associated with  
154 chemical testing in the EU based on REACH requirements. They estimated that the number of  
155 new chemicals expected to fall under REACH would range from 68,000 to 100,000, and, using

156 the lower estimate, they determined that monetary costs would total \$13.6 billion. This scenario  
157 looked at a total of 28 tests of which the ecotoxicity tests included one avian test (OECD TG  
158 223) and three fish tests (OECD TG 203, 210 and 305). Based on differing test requirements for  
159 specific chemicals based on their production volumes, it was estimated that 9,000 ecotoxicity  
160 tests would be needed at an estimated cost of \$186 million (1.4% of the total). It is very difficult  
161 to determine how much is spent annually on ecotoxicity testing worldwide, but we propose a  
162 simple calculation, as follows. Worldwide, it has been estimated that \$2.8 billion is spent  
163 annually on animal experimentation for toxicological research (Hartung 2009). Using the  
164 aforementioned 1.4% as an estimate of the share of the total expenditure realized by these four  
165 fish and avian tests, we estimate that over \$39 million is spent worldwide every year for these  
166 ecotoxicity tests. This estimate, calculated based on data available from 2009, is highly  
167 simplified and likely a gross under-estimation of the true costs (e.g., it does not consider other  
168 ecotoxicity tests and study species including invertebrates, testing for environmental monitoring  
169 or compliance efforts).

170

### 171 *Animal Numbers*

172 The number of animals required for standardized guideline ecotoxicity tests on vertebrate models  
173 ranges from 42 to 350 per test, while tests using NAMs call for 0 (in the case of commercial cell-  
174 lines) to 20 animals or 12 to 320 embryos per test (Figure 1B). The median number of animals  
175 needed for traditional tests (135) is over 6-fold higher than the median number of embryos or  
176 animals needed for alternative tests (20), although it is difficult to definitively make such a  
177 comparison since many alternative tests do not rely on animals (Willett et al. 2011; OECD  
178 2017).



179

180 Within traditional tests we report that overall the median number of fish (150) and birds (120)  
181 required per test is somewhat lower than the median number of amphibians (200). In terms of  
182 NAMs, the numbers needed for fish embryos (320), avian embryos (4 to 40) and cell-based or  
183 cell-free assays (0 to 20) are higher than for rodents and other mammalian species; however,  
184 since many such tests rely on cell lines or in silico methods, the animal usage is essentially zero  
185 irrespective of the species.

186

187 Similar to our understanding of the monetary costs, there have been few estimations of the  
188 number of animals needed for traditional toxicity tests on a global scale. One paper estimated  
189 that approximately 54 million vertebrates would be needed to test about 68,000 chemicals in the  
190 EU based on REACH requirements (Rovida and Hartung 2009). Under this scenario, the number  
191 of fish and birds required for 9,000 of the four ecotoxicity tests (described in the previous  
192 section; OECD TG 223, 203, 210, and 305) was estimated at 1 million (2.2%) (Rovida and  
193 Hartung 2009). Worldwide annual estimates of the usage of animals in the laboratory range from  
194 20 to 100 million (Taylor et al. 2008; Lush 2014). However, for countries such as the USA, these  
195 estimates do not include fish and birds and hence may be an underestimate of the true numbers  
196 of animals from these taxa. Certain countries do report the number of birds and fish used; for  
197 example, in the United Kingdom, 34,700 fish and 17,700 birds were used in 2012 for toxicology  
198 experiments; and in New Zealand 27,949 fish and over 12,000 birds were used for research,  
199 testing and teaching (Lush 2014). While it is not always possible to obtain accurate estimates for  
200 the number of birds and aquatic species used specifically for toxicity testing, using the  
201 aforementioned 2.2% as the share of birds and fish being used for the four ecotoxicity tests and

202 depending on the estimate of total number of animals being considered (20 to 100 million), at a  
203 minimum we may estimate that the worldwide annual usage of fish and birds ranges from  
204 440,000 to 2.2 million.

205  
206 The numbers of animals being used in toxicity testing are much greater when considering  
207 environmental monitoring and regulatory compliance needs. For example, in 2018, numbers  
208 from the Canadian Council on Animal Care (CCAC) showed that in total 52,018 birds (chicken)  
209 and fish (fathead minnow, rainbow trout and zebrafish) were used for regulatory testing of  
210 products for the protection of humans, animals or the environment (CCAC 2018a). This report  
211 also stated that over 84,000 rainbow trout are used annually in relation to two key Canadian  
212 regulations governing effluent testing for metal mining and pulp and paper mill industries  
213 (CCAC 2018b). As of 2017, the compliance rate for these two regulations was greater than 97%,  
214 essentially indicating that only 3% of these effluents displayed adverse effects in the fish (i.e.,  
215 only 2,520 fish exhibited symptoms) (ECCC 2017a; ECCC 2017b). In the private sector, Shell  
216 reported that in Canada, the USA, and the European Union, they used approximately 85,000 fish  
217 for regulatory testing in 2015 although this number reduced to approximately 34,000 in 2017  
218 (Shell 2017). Looking at these numbers it appears that incorporating NAMs into monitoring and  
219 compliance testing could provide an important avenue for notable reductions in the number of  
220 animals required for monitoring and compliance purposes.

221

### 222 *Testing Times*

223 The time required to conduct standard guideline tests on vertebrate models ranges from 2 to 38  
224 weeks, while tests using NAMs typically need 2 to 4 weeks (Figure 1C). The median number of

225 weeks needed for traditional tests (8) is about 2-fold higher than the median number of weeks  
226 needed for alternative tests (4).

227

228 Within traditional tests we see that the median number of weeks needed for avian tests (24) is 2-  
229 to 3-fold higher than the median number of weeks needed for tests involving fish (8) or  
230 amphibians (12.5). In terms of NAMs, the fish studies we report upon need 4 weeks, the avian  
231 studies need 2 to 4 weeks, and cell-free or cell-line based tests need 2 to 3 weeks. In terms of  
232 biomedical species, similar timelines (i.e., few days to a week) are expected owing to the  
233 availability of established cell lines and other alternative testing models.

234

235 There is limited information on the time needed to test panels of chemicals as would be  
236 necessary in a screening program. In the human health domain, it took an estimated 30 years to  
237 obtain toxicity data on 300 chemicals using animal tests compared to the U.S. ToxCast program  
238 which generated data across 600 mechanistic endpoints for 300 chemicals in about five years  
239 (Groff et al. 2014). Looking at the avian ToxCast as an example in ecotoxicology,  
240 transcriptomics data for 16 flame retardants using a chicken hepatocyte culture model were  
241 collected in under 4 weeks (Porter et al. 2014). In comparison, performing egg injection studies  
242 for all 16 chemicals (even if exposures were performed for two chemicals at a time) would have  
243 taken approximately 8 months to complete, and much longer (potentially years) if these were  
244 whole animal studies.

245

246 *Resource comparison of a fit for purpose test*

247 Assessment of acute toxicity is required by REACH for registration of chemicals produced at  
248  $\geq 10$  tons/y and is often a primary component for effluent compliance testing. The accepted  
249 traditional test for fish acute toxicity is OECD TG 203 in which small fish are exposed to test  
250 substances for a period up to 96 hrs during which lethality is monitored (OECD 2019).  
251 Alternative tests proposed for OECD TG 203 include the fish embryotoxicity test (FET) and fish  
252 cell cytotoxicity assays. In Europe, according to the Scientific Directive on Animal  
253 Experimentation, protection is afforded to fish at the onset of exogenous feeding (Embry et al.  
254 2010; Halder et al. 2010) and hence, many countries have adopted the FET as an alternative test.  
255 In 2013, the OECD approved the FET (i.e., Test No 236: Fish Embryo Acute Toxicity Test) as a  
256 standardized test for fish acute toxicity (OECD 2013a). In 2021, the OECD approved the  
257 rainbow trout gill cytotoxicity assay (i.e., Test No 249: Fish Cell Line Acute Toxicity) as a  
258 standardized in vitro test to predict fish acute toxicity (OECD 2021).  
259  
260 Resources required for the OECD TG 203 test include monetary costs that range from \$7,056 to  
261 \$24,140, and 42 fish per test chemical. In comparison, the FET (OECD TG 236) costs ~\$26,000  
262 and requires 320 embryos, and the OECD TG 249 assay costs ~\$2,600, and requires no live fish  
263 since an established cell line is used. Based on the number of chemicals registered for specific  
264 production volumes, there are an estimated 7,656 chemicals produced at over 10 tons/y  
265 (<https://echa.europa.eu/reach-registrations-since-2008>). Thus, conducting OECD TG 203 on all  
266 these chemicals would cost ~\$119.4 million and use ~321,000 fish. In an alternate scenario, all  
267 7,656 chemicals could be initially screened using OECD TG 249 (Fish Cell Line Acute Toxicity)  
268 at a cost of ~\$19.9 million and no use of animals. Assuming that 15% of these chemicals (i.e.,  
269 1,148) are flagged for subsequent toxicity testing using OECD TG 203, then the cost would be

270 an additional ~\$17.9 million. The combined cost of this tiered approach would be ~\$37.8  
271 million and use 48,216 fish. The overall savings would be ~\$81.6 million and ~273,000 fish  
272 lives (Table 1).

273

274

275 **DISCUSSION**

276

277 In ecotoxicology there is a shift underway from toxicity tests that expose whole animals and  
278 measure apical outcomes to ones that use NAMs to test chemicals *in vitro* and in early-life stage  
279 organisms and yield mechanistic information. While such NAMs are considered to be cheaper,  
280 faster, and more ethical than the traditional methods, there has been a lack of empirical evidence  
281 to support such assertions. Here we aimed to synthesize information from available data-  
282 streams to provide a glimpse of the evolving field of ecotoxicity testing and the various costs  
283 associated with traditional and alternative toxicity testing methods. Such an examination is  
284 especially needed as there remain professional and organizational barriers towards this transition  
285 (e.g., concerns over error costs and pattern of familiarity (Mondou et al. 2020)).

286

287 Our analysis provides evidence that NAMs are faster, cheaper and use less animals than  
288 traditional toxicity testing methods. In terms of testing a single chemical using traditional animal  
289 tests, we estimate that the median cost of a test is \$118,000 and that it requires approximately  
290 135 animals and 8 weeks. In comparison, the median cost of an alternative test is \$2,600 and  
291 would require approximately 20 animals (or 40 embryos) and up to 4 weeks to test from 16 to  
292 400 chemicals since several chemicals may be batch-tested. Refer to Table 2 for a snapshot of  
293 the monetary cost, animals and time needed for a representative traditional and alternative test  
294 using fish (fathead minnow or zebrafish) and birds (Japanese quail).

295

296 Testing is costly. For example, countries worldwide spend 7 to 24 billion dollars annually on  
297 pollution abatement and control activities (Statistics Canada 2012; MAPI 2015; Eurostat 2017).

298 In terms of testing chemicals, scenarios out of the European Union present numbers that extend  
299 into billions of dollars (Rovida and Hartung 2009). Even if the backlog of chemicals were  
300 adequately tested, there will always be a need to perform toxicity tests given the introduction of  
301 500 to 1000 new chemicals annually into commerce (Arnold 2015) and the growing number of  
302 environmental sites that require monitoring. Some reports have started to investigate whether the  
303 incorporation of NAMs into testing programs may realize monetary and non-monetary cost  
304 savings. An earlier study concluded that animal testing needs could be reduced by up to 70% by  
305 the adoption of intelligent testing strategies such as quantitative structure activity relationships  
306 (QSARs), grouping and read-across methods (Van der Jagt et al. 2004). A more recent study  
307 estimated that 3 – 15% of chemicals initially screened using NAMs would be prioritized for *in*  
308 *vivo* testing as part of a tiered testing program (Thomas et al. 2017). These initial studies  
309 demonstrate that NAMs may help increase efficiencies though more rigorous evaluations are  
310 needed.

311  
312 Incorporation of NAMs in toxicity testing is starting to be realized by key stakeholders in the  
313 human health domain. A key example is the U.S. EPA's ToxCast program that has screened  
314 thousands of chemicals via hundreds of *in vitro* assays at a fraction of the cost to test these  
315 chemicals using animal bioassays (Dix et al. 2007; Thomas et al. 2019). In ecotoxicology,  
316 regulatory decisions still rely on the outcomes of whole animal studies though progress is being  
317 made in terms of adopting NAMs. First, we are seeing the emergence and acceptance of new  
318 testing systems that may serve as alternatives to animal tests. In 2018, the U.S. EPA listed  
319 OECD Test Guideline #236 (Fish Embryo Acute Toxicity, FET, Test) as an “*alternative test*  
320 *methods or strategies the Administrator has identified that do not require new vertebrate animal*

321 *testing and are scientifically reliable, relevant, and capable of providing information of*  
322 *equivalent or better scientific reliability and quality to that which would be obtained from*  
323 *vertebrate animal testing”* (US EPA 2018). However, European researchers examining the  
324 ability of this OECD Test Guideline #236 to predict outcomes in standard acute fish toxicity tests  
325 for regulatory purposes highlighted several limitations (e.g., the fish embryo test does not capture  
326 key modes of action, or is challenging to use for certain classes of chemicals) (Sobanska et al.  
327 2018), thus illustrating the need for more research activities on the fish embryo test system. For  
328 birds, researchers at Environment and Climate Change Canada (ECCC) have proposed the  
329 standardization of early-life stage toxicity tests using avian eggs though this particular study only  
330 evaluated eight chemicals in one avian species and thus there is a need for additional studies  
331 (Farhat et al. 2019).

332  
333 Second, there is a need for NAMs to be made available in a more consistent and commercial  
334 manner while also being affordable and reliable. Within the ‘omics fields we are starting to see  
335 the arrival of products in the marketplace that can aid in the investigation of the transcriptome,  
336 proteome, and metabolome of species of ecotoxicological interest. For example, a Canadian  
337 team of academic, government and industry partners is co-designing 384-well qPCR arrays  
338 (EcoToxChips) and a corresponding data evaluation tool ([www.ecotoxxplorer.ca](http://www.ecotoxxplorer.ca)) to help  
339 characterize, prioritize and manage environmental contaminants and complex mixtures of  
340 regulatory concern (Basu et al. 2019). We estimate that coupling such a toxicogenomic tool with  
341 alternative testing systems (e.g., the aforementioned fish embryo test or avian egg injection  
342 method) may enable rapid and deeper hazard characterization for ~\$1,000 -5,000 per tested  
343 chemical.



344

345 Finally, as we enter a big data era, the information resulting from NAMs must be rapidly  
346 processed and be amenable for decision-making under a range of contexts. Frameworks such as  
347 adverse outcome pathways (AOPs) and the OECD's AOP Knowledgebase  
348 (<https://aopkb.oecd.org/>) along with standardized reporting templates and Findable, Accessible,  
349 Interoperable and Reusable (FAIR) principles could better help enable the user community to  
350 maximize the use of data. The ecotoxicological community is also starting to benefit from a  
351 diverse set of relevant and publicly accessible tools that allow users to efficiently query large  
352 databases of chemicals and toxicological information (e.g., U.S. EPA's CompTox Dashboard  
353 and the ECOTOX Knowledgebase), perform species read-across assessments (U.S. EPA's  
354 SeqAPASS, EnviroToxDatabase.org), conduct risk assessments (HESI Risk 21, CAFÉ), derive  
355 transcriptomic points of departure (BMDExpress2, FastBMD - [www.fastbmd.ca](http://www.fastbmd.ca)), and analyze  
356 various 'omics data: EcoToxXplorer ([www.ecotoxplorer.ca](http://www.ecotoxplorer.ca)), NetworkAnalyst  
357 ([www.networkanalyst.ca](http://www.networkanalyst.ca)), MetaboAnalyst ([www.metaboanalyst.ca](http://www.metaboanalyst.ca)), and MicrobiomeAnalyst  
358 ([www.microbiomeanalyst.ca](http://www.microbiomeanalyst.ca)).

359

360 Nevertheless, there are a number of challenges associated with the adoption of NAMs. For  
361 instance, the two approaches examined here – traditional methods and NAMs – provide different  
362 types of data; risk assessment and regulatory decisions are typically made based on apical results  
363 including mortality, reproductive or developmental effects, which are obtained from traditional  
364 methods. However, NAMs typically provide mechanistic information including cytotoxicity,  
365 receptor binding, enzyme activity, and large sets of omics data (Villeneuve and Garcia-Reyero  
366 2011). Extrapolating such results from NAMs across various levels of biological organization,

367 i.e., sub-cellular and cellular level to predict effects in the whole organism in an accurate manner  
368 presents a major challenge in obtaining biologically relevant information (van Vliet 2011). Thus,  
369 the predictive capacity of NAMs to whole animal methods is one of the main obstacles to  
370 implementing and integrating them into the decision making process.

371  
372 The question regarding the biological relevance of data obtained from these methods leads to the  
373 issue of acceptance of the methods within regulatory bodies. While there has been increased  
374 interest in the development of these types of methods, acceptance of these methods within the  
375 ecotoxicological community is lacking. Thus, if the NAMs being developed and validated do not  
376 gain acceptance, they are perhaps of not much practical use regardless of how resource efficient  
377 they may be. Other challenges associated with NAMs are related to the difference in national  
378 regulations. Data from studies for the same endpoints in one country may not be acceptable in  
379 other countries thus resulting in the need to repeat the study and thereby increase costs. Further,  
380 the analyses of complex data generated by NAMs often require specialized skills and knowledge  
381 and thus calling upon additional assistance for data analysis can add to the total costs.

382  
383 Based on our analysis, here we conclude that NAMs in ecotoxicology can be more advantageous  
384 than traditional methods in terms of resources required (i.e., monetary costs, number of animals  
385 needed, and testing times). However, there is a need for carefully designed case studies that  
386 demonstrate the domain of applicability of NAMs to ultimately build confidence among the user  
387 community (Kavlock et al. 2018). Thus, we note that the evidence underpinning these  
388 conclusions is relatively sparse and that moving ahead, groups developing and applying NAMs  
389 should provide more detailed accounts of the resources required.

390

391 **REFERENCES**

392 Arnold C. 2015. ToxCast wants you: Recommendations for Engaging the Broader Scientific  
393 Community. 123(1):2015. doi:10.1289/ehp.1408601.The.

394

395 Basu N, Crump D, Head J, Hickey G, Hogan N, Maguire S, Xia J, Hecker M. 2019.  
396 EcoToxChip: A next-generation toxicogenomics tool for chemical prioritization and  
397 environmental management. Environ Toxicol Chem. 38(2):279–288. doi:10.1002/etc.4309.

398

399 Bottini A a, Hartung T. 2009. Food for thought... on the economics of animal testing. ALTEX.  
400 26(1):3–16.

401

402 Burden N, Benstead R, Clook M, Doyle I, Edwards P, Maynard SK, Ryder K, Sheahan D, Whale  
403 G, van Egmond R, et al. 2016. Advancing the 3Rs in regulatory ecotoxicology: A pragmatic  
404 cross-sector approach. Integr Environ Assess Manag. 12(3):417–421. doi:10.1002/ieam.1703.

405

406 CCAC. 2018a. CCAC Animal Data Report 2018.

407

408 CCAC. 2018b. Canadian Council on Animal Care: Annual Animal Data Reports. [accessed 2019  
409 Nov 24]. [https://www.ccac.ca/en/facts-and-legislation/animal-data/annual-animal-data-](https://www.ccac.ca/en/facts-and-legislation/animal-data/annual-animal-data-reports.html)  
410 [reports.html](https://www.ccac.ca/en/facts-and-legislation/animal-data/annual-animal-data-reports.html).

411

412 Costin G-E. 2014. Skin Irritation and Corrosion Webinar.

413

414 Dix D, Houck K, Martin M, Richard A. 2007. The ToxCast program for prioritizing toxicity  
415 testing of environmental chemicals. *Toxicol Sci.* 95(1):5-12. doi: 10.1093/toxsci/kfl103.  
416  
417 ECCC. 2017a. Pulp and paper effluent quality.  
418  
419 ECCC. 2017b. Metal Mining Effluent Quality.  
420  
421 Embry MR, Belanger SE, Braunbeck TA, Galay-Burgos M, Halder M, Hinton DE, Léonard MA,  
422 Lillicrap A, Norberg-King T, Whale G. 2010. The fish embryo toxicity test as an animal  
423 alternative method in hazard and risk assessment and scientific research. *Aquat Toxicol.*  
424 97(2):79–87. doi:10.1016/j.aquatox.2009.12.008.  
425  
426 European Chemicals Agency. 2016. New Approach Methodologies in Regulatory Science  
427 Proceedings of a scientific workshop.  
428  
429 Eurostat. 2017. Environmental protection expenditure accounts - Statistics Explained. [accessed  
430 2018 Mar 8]. [http://ec.europa.eu/eurostat/statistics-](http://ec.europa.eu/eurostat/statistics-explained/index.php/Environmental_protection_expenditure_accounts)  
431 [explained/index.php/Environmental\\_protection\\_expenditure\\_accounts](http://ec.europa.eu/eurostat/statistics-explained/index.php/Environmental_protection_expenditure_accounts).  
432  
433 Farhat A, Crump D, Bidinosti L, Boulanger E, Basu N, Hecker M, Head JA. 2019. An Early–  
434 Life Stage Alternative Testing Strategy for Assessing the Impacts of Environmental Chemicals  
435 in Birds. *Environ Toxicol Chem.* 39(1):141–154. doi:10.1002/etc.4582.  
436

- 437 Groff K, Bachli E, Lansdowne M, Capaldo T. 2014. Review of Evidence of Environmental  
438 Impacts of Animal Research and Testing. *Environments*. 1(1):14–30.  
439 doi:10.3390/environments1010014.  
440
- 441 Halder M, Léonard M, Iguchi T, Oris JT, Ryder K, Belanger SE, Braunbeck TA, Embry MR,  
442 Whale G, Norberg-King T, et al. 2010. Regulatory aspects on the use of fish embryos in  
443 environmental toxicology. *Integr Environ Assess Manag*. 6(3):484–491. doi:10.1002/ieam.48.  
444
- 445 Hartung T. 2009. Toxicology for the twenty-first century. *Nature*. 460(7252):208–212.  
446 doi:10.1038/460208a.  
447
- 448 Humane Society International. Costs of Animal and Non-Animal Testing. [accessed 2020 Feb 7].  
449 [https://www.hsi.org/news-media/time\\_and\\_cost/](https://www.hsi.org/news-media/time_and_cost/).  
450
- 451 Van der Jagt K, Munn S, Torslov J, de Bruijn J. 2004. Alternative approaches can reduce the use  
452 of test animals under REACH. *Rep Eur*. 21405(November):1–25.  
453
- 454 Kavlock RJ, Bahadori T, Barton-Maclaren TS, Gwinn MR, Rasenberg M, Thomas RS. 2018.  
455 Accelerating the Pace of Chemical Risk Assessment. *Chem Res Toxicol*. 31(5):287–290.  
456 doi:10.1021/acs.chemrestox.7b00339.  
457

458 Landrigan PJ, Fuller R, Acosta NJ, Adeyi O, Arnold R, Basu N, Baldé AB, Bertollini R, Bose-  
459 O'Reilly S, Boufford JI, et al. 2017. The Lancet Commission on pollution and health. *Lancet*.  
460 391(10119):462-512. doi: 10.1016/S0140-6736(17)32345-0.  
461  
462 Lillicrap A, Belanger S, Burden N, Pasquier D Du, Embry MR, Halder M, Lampi MA, Lee L,  
463 Norberg-King T, Rattner BA, et al. 2016. Alternative approaches to vertebrate ecotoxicity tests  
464 in the 21st century: A review of developments over the last 2 decades and current status. *Environ*  
465 *Toxicol Chem.* 35(11):2637–2646. doi:10.1002/etc.3603.  
466  
467 Lush. 2014. A Global View of Animal Experiments. :327–342.  
468  
469 MAPI. 2015. An International Comparison of Pollution Abatement and Waste Management  
470 Costs — MAPI Foundation. [accessed 2018 Mar 6].  
471 [https://mapifoundation.org/economic/2015/3/6/an-international-comparison-of-pollution-](https://mapifoundation.org/economic/2015/3/6/an-international-comparison-of-pollution-abatement-and-waste-management-costs)  
472 [abatement-and-waste-management-costs.](https://mapifoundation.org/economic/2015/3/6/an-international-comparison-of-pollution-abatement-and-waste-management-costs)  
473  
474 Meigs L, Smirnova L, Rovida C, Leist M, Hartung T. 2018. Animal testing and its alternatives -  
475 the most important omics is economics. *ALTEX.* 35(3):275–305. doi:10.14573/altex.1807041.  
476  
477 Mondou M, Hickey GM, Rahman HMT, Maguire S, Pain G, Crump D, Hecker M, Basu N.  
478 2020. Factors affecting the perception of New Approach Methodologies (NAMs) in the  
479 ecotoxicology community. *Integr Environ Assess Manag.:*ieam.4244. doi:10.1002/ieam.4244.  
480

481 Norberg-King TJ, Embry MR, Belanger SE, Braunbeck T, Butler JD, Dorn PB, Farr B, Guiney  
482 PD, Hughes SA, Jeffries M, et al. 2018. An International Perspective on the Tools and Concepts  
483 for Effluent Toxicity Assessments in the Context of Animal Alternatives: Reduction in  
484 Vertebrate Use. *Environ Toxicol Chem.* 37(11):2745–2757. doi:10.1002/etc.4259.  
485  
486 NRC. 2007. Toxicity testing in the 21st century: a vision and a strategy. Natl Acad Press  
487 Washington, DC. doi:10.1080/10937404.2010.483176.  
488  
489 OECD. 1984. Test No. 206: Avian Reproduction Test.  
490  
491 OECD. 2002. OECD 223 Avian acute study.  
492  
493 OECD. 2009a. Test No. 230: 21-day Fish Assay: A Short-Term Screening for Oestrogenic and  
494 Androgenic Activity, and Aromatase Inhibition. *OECD Guidel Test Chem Sect*  
495 2,.(September):1–38. doi:10.1787/9789264076228-en.  
496  
497 OECD. 2009b. OECD 231 Amphibian Metamorphosis Assay.  
498  
499 OECD. 2011. Test No.234: Fish Sexual Development Test.  
500  
501 OECD. 2012a. Test No. 229: Fish Short Term Reproduction Assay.  
502  
503 OECD. 2012b. OECD TG 305 Bioaccumulation in fish.

504

505 OECD. 2013a. Test No. 236: Fish Embryo Acute Toxicity (FET) Test. (July):1–22.

506 doi:10.1787/9789264203709-en.

507

508 OECD. 2013b. OECD 210 Fish Early Life Stage Toxicity Test.

509

510 OECD. 2015a. OECD 240 Medaka Extended One Generation Reproduction Test (MEOGRT).

511

512 OECD. 2015b. OECD 241 The Larval Amphibian Growth and Development Assay (LAGDA).

513

514 OECD. 2017. Guidance document on standardised test guidelines for evaluating chemicals for

515 endocrine disruption.

516

517 OECD. 2019. Test Guideline No 203: Fish, Acute Toxicity Test.

518

519 OECD. 2021. Test Guideline No . 249 Fish Cell Line Acute Toxicity□: The RTgill-W1 cell line

520 assay. Paris.

521

522 Pain, G., Hickey, G., Mondou, M., Crump, D., Hecker, M., Basu, N., & Maguire, S. (2020).

523 Drivers of and obstacles to the adoption of toxicogenomics for chemical risk assessment: insights

524 from social science perspectives. *Environ Health Perspect.* 128(10): 105002.

525

526 Porter E, Crump D, Egloff C, Chiu S, Kennedy SW. 2014. Use of an avian hepatocyte assay and



527 the avian toxchip polymerase chain reaction array for testing prioritization of 16 organic flame  
528 retardants. *Environ Toxicol Chem.* 33(3):573–582. doi:10.1002/etc.2469.  
529  
530 Rockström J, Steffen W, Noone K, Persson Å, Chapin FS, Lambin E, Lenton TM, Scheffer M,  
531 Folke C, Schellnhuber HJ, et al. 2009. Planetary boundaries: Exploring the safe operating space  
532 for humanity. *Ecol Soc.* 14(2). doi:10.5751/ES-03180-140232.  
533  
534 Rovida C, Hartung T. 2009. Re-evaluation of animal numbers and costs for in vivo tests to  
535 accomplish REACH legislation requirements for chemicals - A report by the transatlantic think  
536 tank for toxicology (t 4). *ALTEX.* 26(3):187–208.  
537  
538 Settivari RS, Ball N, Murphy L, Rasoulpour R, Boverhof DR, Carney EW, Union E. 2015.  
539 Predicting the Future: Opportunities and Challenges for the Chemical Industry to Apply 21st-  
540 Century Toxicity Testing. *J Am Assoc Lab Anim Sci.* 54(2):214–223.  
541  
542 Shell. 2017. *Animal Welfare Report 2017.*  
543  
544 Sobanska M, Scholz S, Nyman AM, Cesnaitis R, Gutierrez Alonso S, Klüver N, Kühne R, Tyle  
545 H, de Knecht J, Dang Z, et al. 2018. Applicability of the fish embryo acute toxicity (FET) test  
546 (OECD 236) in the regulatory context of Registration, Evaluation, Authorisation, and Restriction  
547 of Chemicals (REACH). *Environ Toxicol Chem.* 37(3):657–670. doi:10.1002/etc.4055.  
548  
549 Stanton K, Kruszewski FH. 2016. Quantifying the benefits of using read-across and in silico

550 techniques to fulfill hazard data requirements for chemical categories. *Regul Toxicol Pharmacol.*  
551 81:250–259. doi:10.1016/j.yrtph.2016.09.004.

552  
553 Statistics Canada. 2012. Capital expenditures on pollution abatement and control (end-of-pipe)  
554 by medium and industry.

555  
556 Taylor K, Gordon N, Langley G, Higgins W. 2008. Estimates for Worldwide Laboratory Animal  
557 Use in 2005. LAB.

558  
559 Thomas RS, Bahadori T, Buckley TJ, Cowden J, Deisenroth C, Dionisio KL, Frithsen JB, Grulke  
560 CM, Gwinn MR, Harrill JA, et al. 2019. The Next Generation Blueprint of Computational  
561 Toxicology at the U.S. Environmental Protection Agency. *Toxicol Sci.* 169(2):317–332.  
562 doi:10.1093/toxsci/kfz058.

563  
564 Thomas RS, Cheung R, Westphal M, Krewski D, Andersen ME. 2017. Risk science in the 21st  
565 century: a data-driven framework for incorporating new technologies into chemical safety  
566 assessment. *Int J Risk Assess Manag.* 20(1/2/3):88. doi:10.1504/IJRAM.2017.082560.

567  
568 US EPA. 1996. 850.1500 Fish life cycle toxicity test.

569  
570 US EPA. 2015. 890.2100 Avian two-generation toxicity test.

571  
572 US EPA. 2018. List of Alternative Test Methods and Strategies ( or New Approach

573 Methodologies [ NAMs ]).

574

575 US EPA. 2019. Alternative Test Methods and Strategies to Reduce Vertebrate Animal Testing.

576 [accessed 2020 Mar 23]. [https://www.epa.gov/assessing-and-managing-chemicals-under-](https://www.epa.gov/assessing-and-managing-chemicals-under-tsca/alternative-test-methods-and-strategies-reduce)

577 [tsca/alternative-test-methods-and-strategies-reduce](https://www.epa.gov/assessing-and-managing-chemicals-under-tsca/alternative-test-methods-and-strategies-reduce).

578

579 Villeneuve DL, Garcia-Reyero N. 2011. Vision & strategy: Predictive ecotoxicology in the 21st

580 century. *Environ Toxicol Chem.* 30(1):1–8. doi:10.1002/etc.396.

581

582 van Vliet E. 2011. Current standing and future prospects for the technologies proposed to

583 transform toxicity testing in the 21st century. *ALTEX Alternatives to Anim Exp.* 28(1):17–44.

584

585 Willett CE, Bishop PL, Sullivan KM. 2011. Application of an integrated testing strategy to the

586 U.S. EPA endocrine disruptor screening program. *Toxicol Sci.* 123(1):15–25.

587 doi:10.1093/toxsci/kfr145.

588

589

590 **TABLES AND FIGURES**

591  
592

593 **Table 1:** Comparison of the traditional fish acute toxicity test (OECD TG 203) and fish new  
594 approach method (OECD TG 249) to test 7,656 chemicals produced over 10 tons/y. Assume  
595 15% of the chemicals (1,148) are prioritized for further testing. OECD = Organization for  
596 Economic Cooperation and Development; TG = Test Guideline

597

| Test type         | Traditional | Alternative | Strategy 1 - traditional     |                              | Strategy 2 - alternative     |              | Total        | Savings |
|-------------------|-------------|-------------|------------------------------|------------------------------|------------------------------|--------------|--------------|---------|
|                   |             |             | OECD 203 for 7,656 chemicals | OECD 249 for 7,565 chemicals | OECD 203 for 1,148 chemicals | OECD 203     |              |         |
| Monetary cost     | 15,598      | 2,600       | \$119,418,288                | \$19,905,600                 | \$17,906,504                 | \$37,812,104 | \$81,606,184 |         |
| Number of animals | 42          | 0           | 321,552                      | 0                            | 48,216                       | 48,216       | 273,336      |         |
| Time (weeks)      | 2           | 1           | 15,312                       | 7,656                        | 2,296                        | 9,952        | 5,360        |         |

598

599

600 **Table 2:** Comparison of resources needed to evaluate one chemical in a traditional (whole  
601 animal) test versus an alternative (new approach method) test for a fish and a bird in terms of  
602 monetary costs, number of animals used, and test duration. OECD = Organization for Economic  
603 Cooperation and Development; TG = Test Guideline; ECCC = Environment and Climate Change  
604 Canada

| Species                                  | Tests                                       | Money (USD) | # of Animals | Time (weeks) |
|------------------------------------------|---------------------------------------------|-------------|--------------|--------------|
| Fish (Fathead minnow or Japanese medaka) | OECD TG 229 (traditional)                   | 104,922     | 72           | 8            |
|                                          | OECD TG 210 (alternative)                   | 5,250       | 320 eggs     | 4            |
| Japanese quail                           | OECD TG 223 (traditional)                   | 120,000     | 70           | 6            |
|                                          | ECCC <i>in ovo</i> injections (alternative) | 1,250       | 40 eggs      | 4            |

605

606

607 **FIGURE CAPTIONS**

608

609 **Figure 1:** Costs associated with traditional and alternative testing strategies in terms of A)

610 monetary costs in USD (United States Dollar; where possible, data are presented as median

611 (black circle) and the range (bar represents minimum to maximum cost)), B) number of adult

612 animals or embryos, and C) time in weeks. For further details on the tests and references please

613 see Supplementary Table ST3.

614

615 A

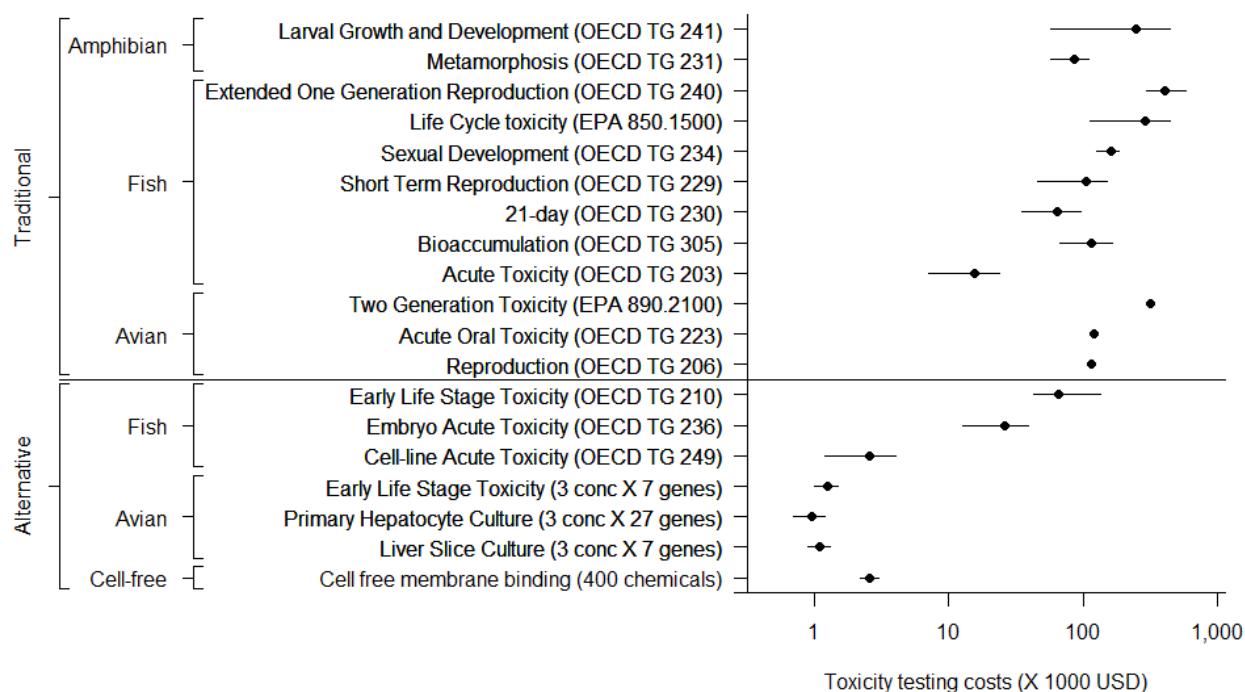

616

617

618

619

620

621

622 B

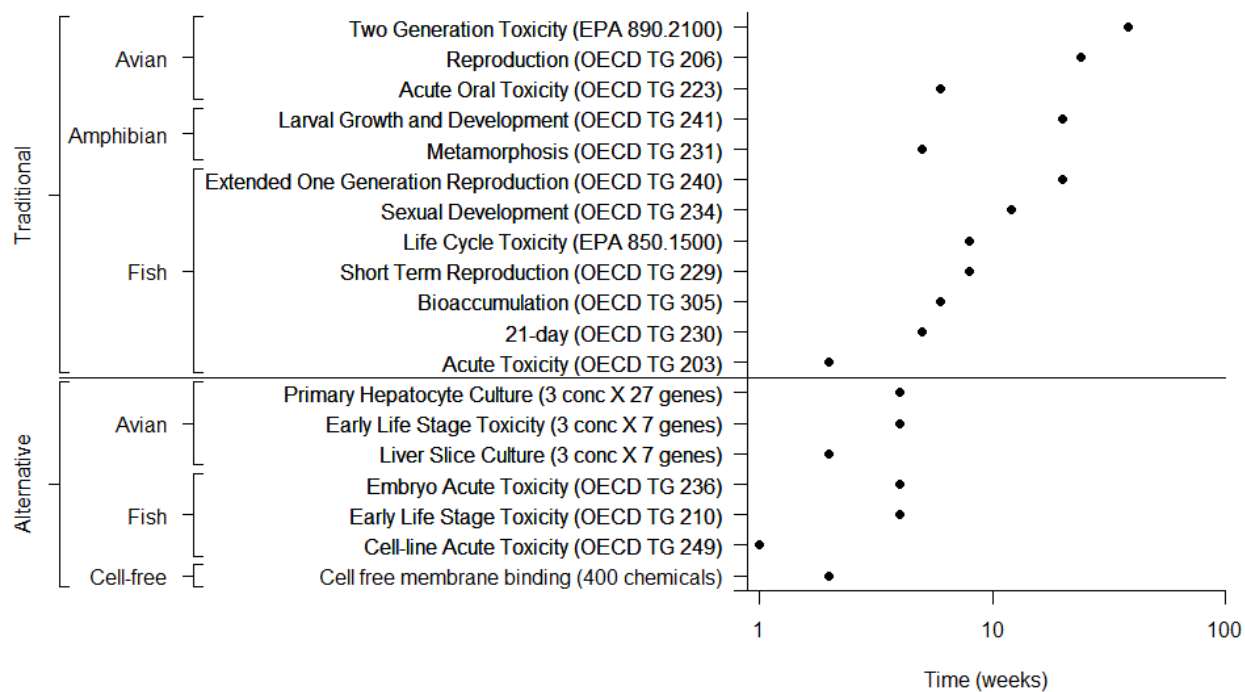

623

624

625

626 C

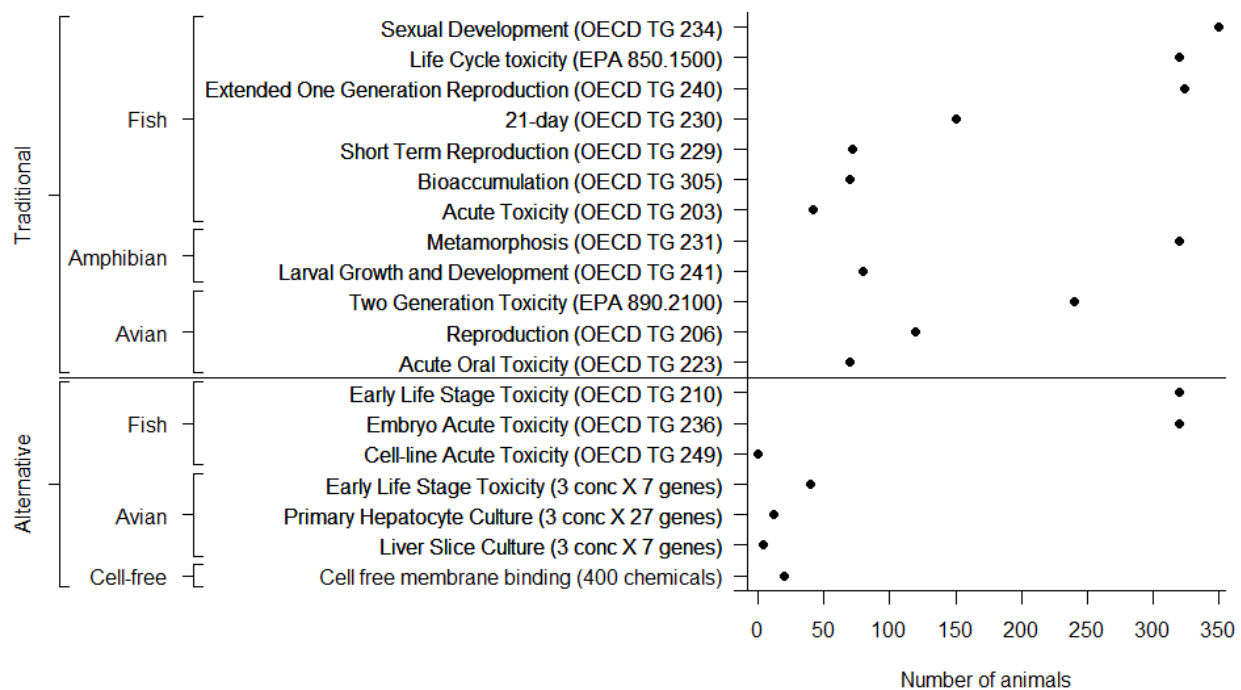

627

628

629
